# Supplementary material
Source: MDPI journal article supplement (https://www.mdpi.com/2075-4701/9/12/1332)
Supplement: s1 [file s1]

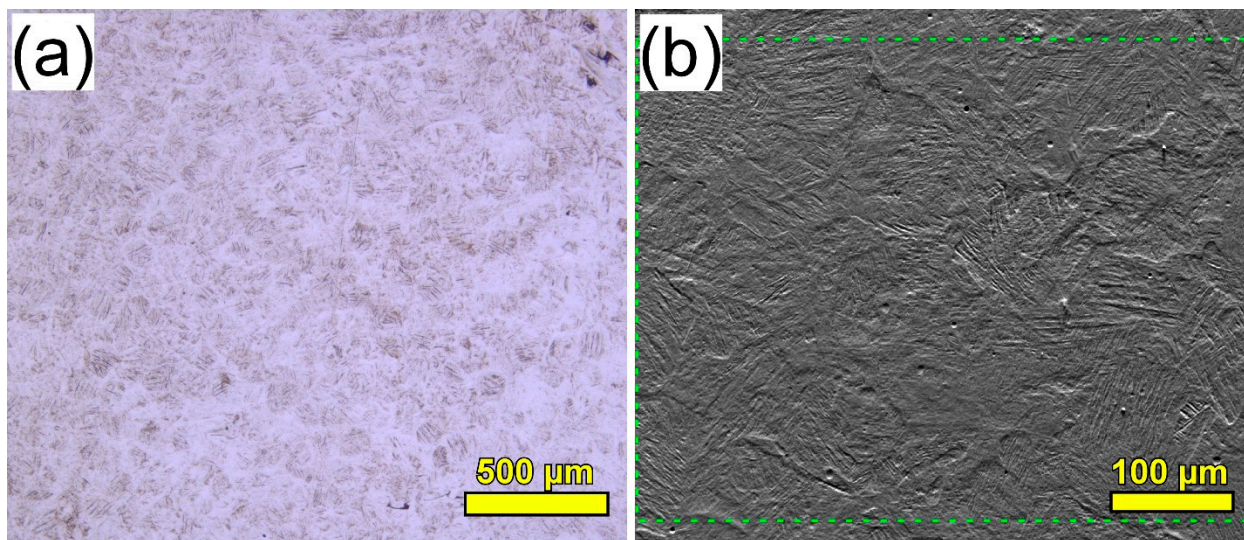

**Figure S1.** (a) Optical microscopy image and (b) SEM (scanning electron microscope) micrograph of the Ti6Al4V sample produced by the SLM method. (c) A typical EDXS spectrum (energy dispersive X-ray spectroscopy) recorded for the Ti6Al4V sample 3D printed by SLM (selective laser melting).

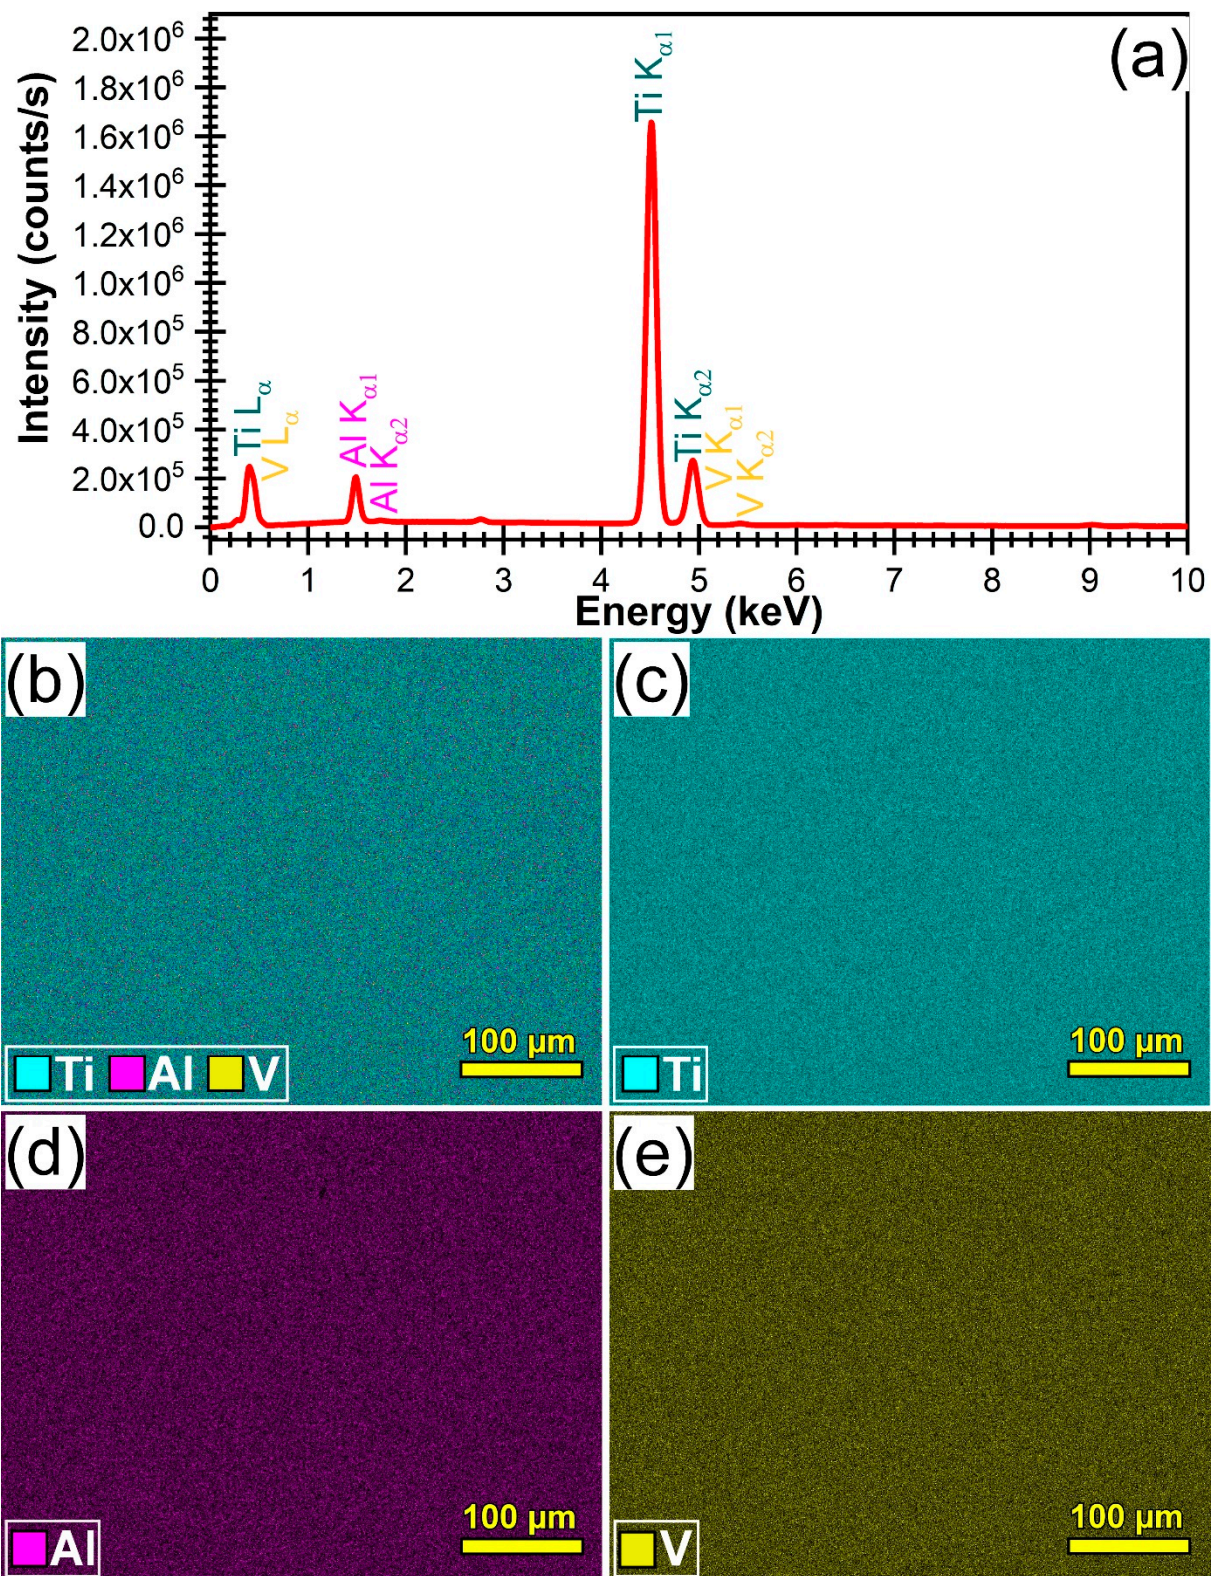

**Figure S2.** (a) A typical EDXS spectrum recorded for the Ti6Al4V sample 3D printed by SLM. Compositional EDXS maps for (b) all constitutive elements (overlaid), (c) Ti, (d) Al and (e) V, collected for the area highlighted in the microscopic field presented in (Figure S1b).
